# Supplementary material
Source: PubMed Central journal article supplement (PMC2890762)
Supplement: 1001908107_pnas.1001908107_SI.pdf [file 1001908107_pnas.1001908107_SI.pdf]

# Supporting Information

Li et al. 10.1073/pnas.1001908107

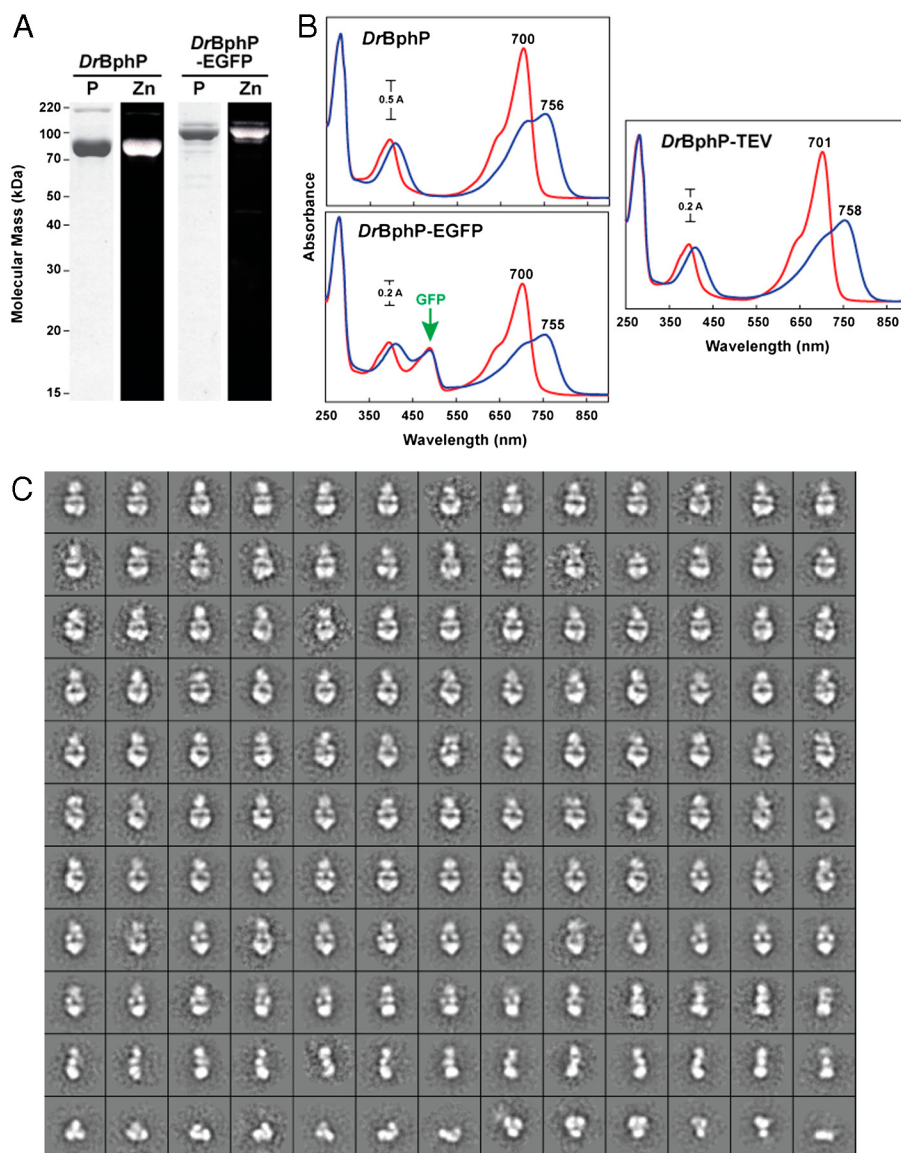

**Fig. S1.** Characterization of the *DrBphP* chromoproteins used in this study. (A) Recombinant *DrBphP* and *DrBphP*-EGFP apoproteins were assembled with BV, purified by nickel-chelating affinity and size exclusion chromatography, and either stained for protein with Coomassie Blue (P) or assayed for the covalently attached bilin by zinc-induced fluorescence (Zn) following SDS-PAGE. (B) UV-Vis absorption spectra of the *DrBphP*, *DrBphP*-EGFP, and *DrBphP*-TEV chromoproteins as Pr (solid lines) or following saturating R, which generates an approximately 80% mixture of Pfr (dashed lines). The extra peak at approximately 500 nm in *DrBphP*-EGFP reflects the absorption of the EGFP moiety (green arrow). (C) A sampling of 2D class averages of the negative-staining EM images generated with *DrBphP* particles. The prevalent side views are shown in the upper nine rows, whereas the less common edge-on and tilted views, and the rare top views are shown in the bottom two rows.
